# Supplementary material for: PTEN expression by an oncolytic herpesvirus directs T-cell mediated tumor clearance
Source: PubMed Central journal article supplement (PMC6258708; doi:10.1038/s41467-018-07344-1), 2018-11-27
Supplement: 41467_2018_7344_MOESM2_ESM.pdf [file 41467_2018_7344_MOESM2_ESM.pdf]

## Description of Additional Supplementary Files

**File Name:** Supplementary Data 1

**Description:** Antibodies use for western blots (grey), immunocytochemistry (ICC, green), immunohistochemistry (IHC, orange), flow cytometry (blue), and T-cell depletion (pink) studies are specified, along with the species reactivity, isotype used, manufacturer, catalog number, and dilution utilized.
